# Supplementary material
Source: PubMed Central journal article supplement (PMC3839253)
Supplement: NIHMS490151-supplement-Suppl_Material.pdf [file NIHMS490151-supplement-Suppl_Material.pdf]

## Supplementary Data

**Supplemental Figure 1: *Arf* loss accelerates disease.** [A] *Arf*<sup>-/-</sup> mice exhibited significantly reduced overall survival after urethane injection (logrank test for trend,  $P < 0.0001$ ). [B] *Arf*<sup>-/-</sup> animals developed larger lung tumors than their *Arf*<sup>+/-</sup> and *Arf*<sup>+/+</sup> littermates (\*\*\*\*  $P < 0.0001$ ). Analysis was performed on the same dataset as Fig. 1D, but tumors were plotted individually and statistical comparisons between genotypes were performed using the Mann Whitney test.

**Supplemental Figure 2: Expression of the cell proliferation marker Ki67.** Although not reaching statistical significance, adenocarcinomas from *Arf*<sup>-/-</sup> animals displayed a clear trend toward increased Ki67 staining compared to *Arf*<sup>+/+</sup> ( $P = 0.0831$ ;  $n = 40$  *Arf*<sup>+/+</sup> and 96 *Arf*<sup>-/-</sup> AC fields counted).

**Supplemental Figure 3: Absence of apoptosis in tumors of all genotypes.** Cleaved caspase 3 staining of adenomas and adenocarcinomas from *Arf*<sup>+/+</sup> and *Arf*<sup>-/-</sup> mice. All fields examined were largely or entirely negative for immunoreactivity. A lung adenocarcinoma from an irradiated (4Gy/4hr) *Arf*<sup>-/-</sup> mouse serves as positive control. Arrowheads identify CC3-positive cells. Scale bars 100  $\mu\text{m}$ .

**Supplemental Figure 4: Activation of the RAS pathway in urethane-induced tumors.** [A] The codon 61 glutamine (Q) residue of *Kras* in both *Arf*<sup>+/+</sup> and *Arf*<sup>-/-</sup> lung tumors was mutated to leucine (L) or arginine (R). The glycine (G) 12 and 13 amino acids were unaffected ( $n = 4$  each genotype). [B] Relative intensities of phosphorylated versus total ERK1/2 in nuclear and cytoplasmic protein fractions from adenocarcinomas of both genotypes, as shown in Figure 6A.

Nuclear phosphorylated ERK1/2 levels appear to be increased in *Arf*<sup>-/-</sup> adenocarcinomas compared to *Arf*<sup>+/+</sup>, although the difference does not reach statistical significance ( $P = 0.1892$  for nuclear fraction,  $P = 0.3089$  for cytoplasmic fraction). [C] IHC reveals predominantly nuclear localization of phospho-ERK1/2 protein in tumors from *Arf*<sup>-/-</sup> animals. In contrast, tumors isolated from wild-type animals exhibited cytoplasmic phospho-ERK1/2 expression. Scale bars 100  $\mu\text{m}$ .

**Supplemental Figure 5: ARF-p53 signaling pathway in lung tumors.** [A] ARF protein was undetectable by IHC in normal lung bronchioles, alveolar spaces, and stroma. Scale bars 100  $\mu\text{m}$ . [B] ARF and p21 co-localized in lung tumors from *Arf*<sup>+/+</sup> mice (top), but staining for phospho-histone H2A.X was largely negative. In *Arf*<sup>-/-</sup> tumors (bottom), p21 staining correlated with H2AX<sup>+</sup> tumor regions. Insets show magnified, matched regions of staining. Scale bars 100  $\mu\text{m}$ . [C] Quantitative RT-PCR identified decreased *Mdm2* expression in *Arf*-deficient lung adenocarcinomas compared to wild-type ( $n = 6$  samples each genotype; \*  $P = 0.0241$ ). [D] Quantitative RT-PCR found no significant difference in *Bax* expression in *Arf*-deficient lung adenocarcinomas compared to wild-type ( $n = 5$  samples each genotype;  $P = 0.0914$ ). [E] All tumors examined were negative for phosphorylated p53 (Ser15) expression by Western blot. Irradiated spleen was used as positive control, and  $\beta$ -actin was used as loading control. The arrow indicates  $\beta$ -actin band.



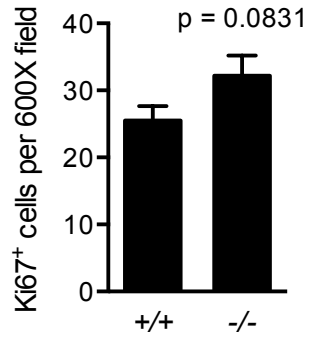

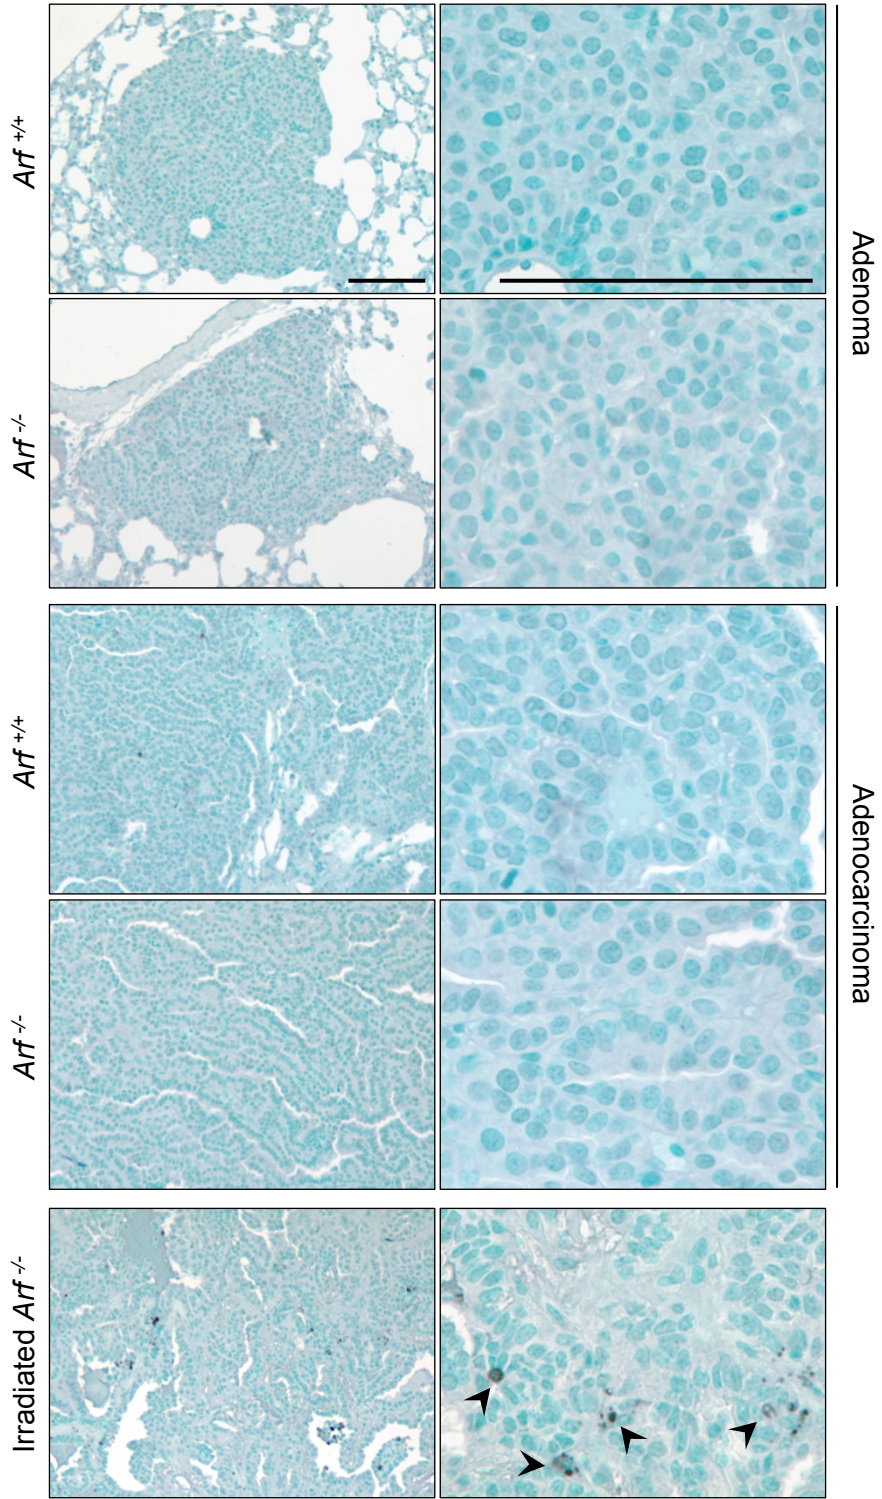

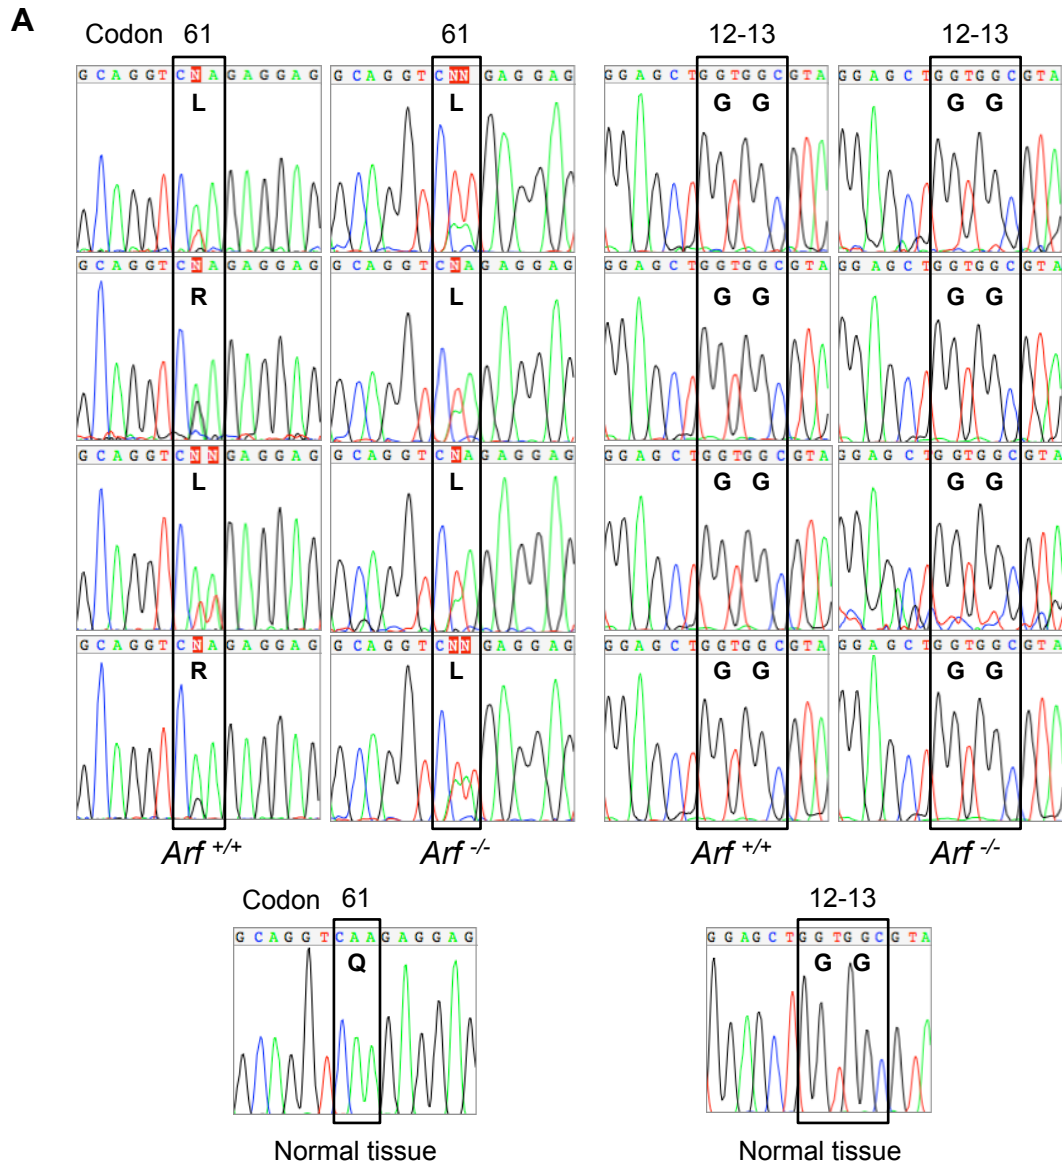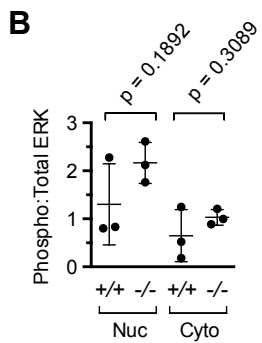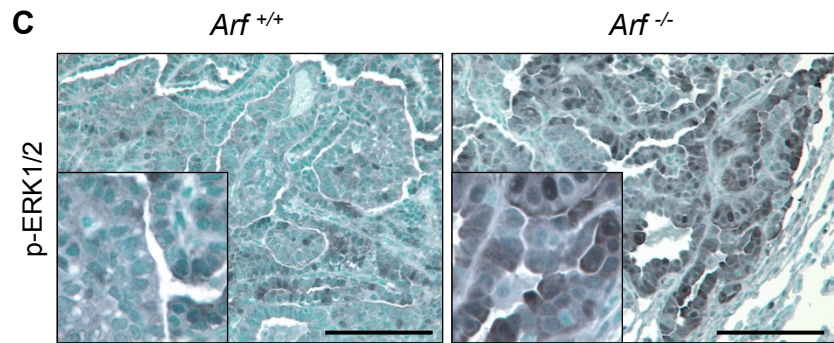

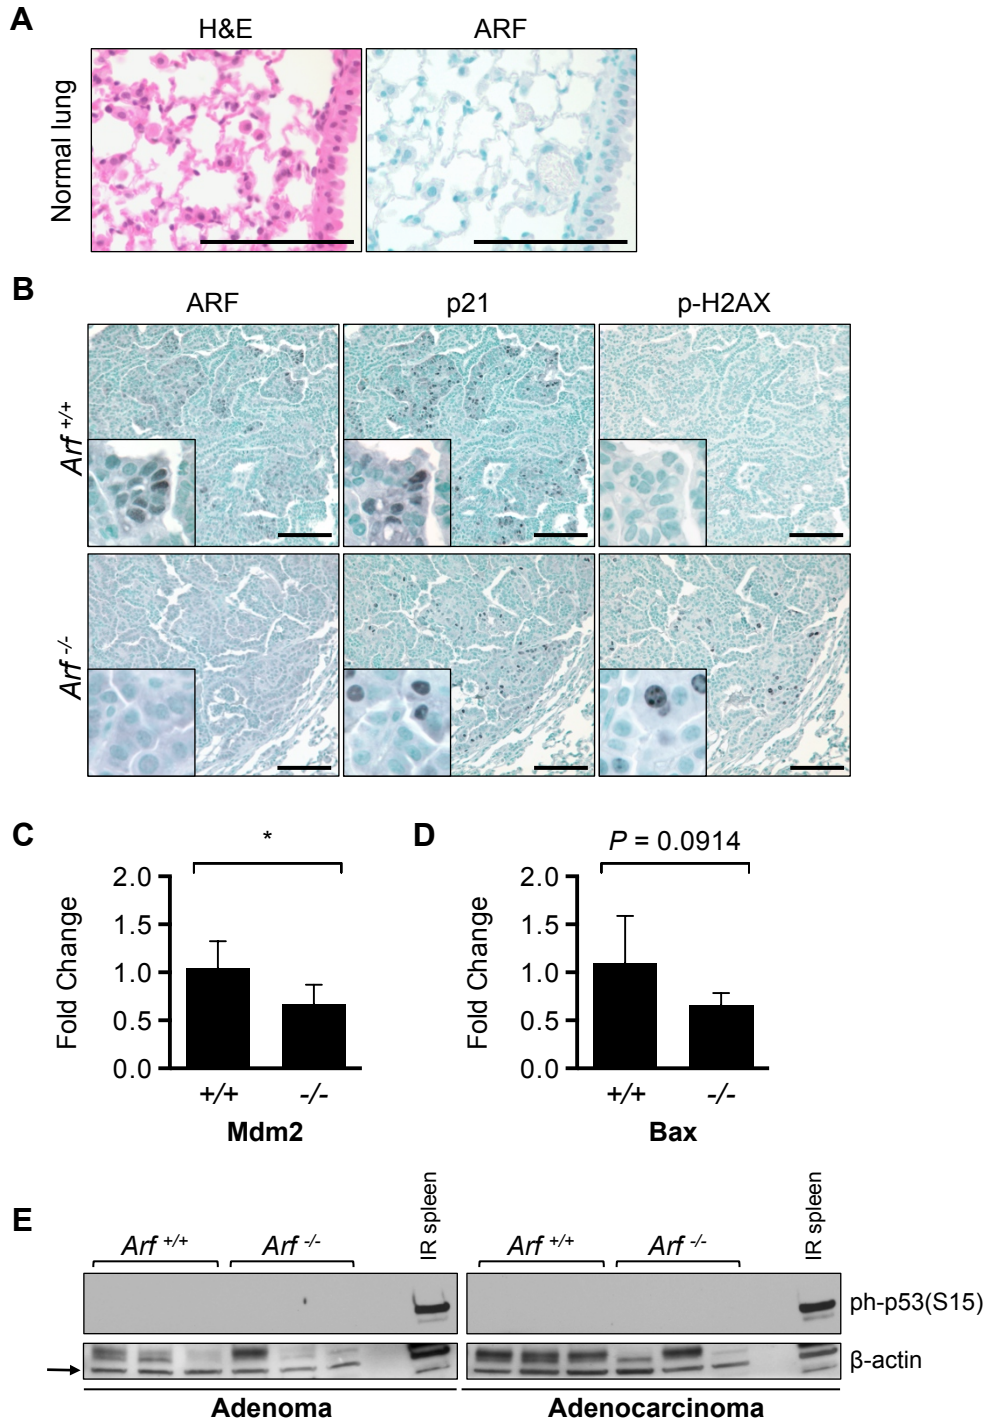

**Supplemental Table 1 - Mutations in *Trp53* in Urethane-induced Lung Adenocarcinomas<sup>1</sup>**

| ID | Genotype                  | Tissue | <i>Trp53</i> mutation | Amino Acid Change | Type of Mutation | Region | Functional Domain |
|----|---------------------------|--------|-----------------------|-------------------|------------------|--------|-------------------|
| 1  | <i>Arf</i> <sup>+/+</sup> | AC     | CTG -> CCG (558bp)    | L134P             | Missense         | Exon 5 | DNA Binding       |
| 2  | <i>Arf</i> <sup>+/+</sup> | AC     | NM <sup>2</sup>       |                   |                  |        |                   |
| 3  | <i>Arf</i> <sup>+/+</sup> | AC     | TGC -> TGT (979bp)    | C274C             | Synonymous       | Exon 8 | --                |
| 4  | <i>Arf</i> <sup>+/+</sup> | AC     | NM                    |                   |                  |        |                   |
| 5  | <i>Arf</i> <sup>+/+</sup> | AC     | NM                    |                   |                  |        |                   |
| 6  | <i>Arf</i> <sup>+/+</sup> | AC     | NM                    |                   |                  |        |                   |
| 7  | <i>Arf</i> <sup>+/+</sup> | AC     | CAG -> CGG (723bp)    | Q189R             | Missense         | Exon 6 | DNA Binding       |
| 8  | <i>Arf</i> <sup>+/+</sup> | AC     | ACC -> GCC (1133bp)   | N326A             | Missense         | Exon 9 | DNA Binding       |
| 9  | <i>Arf</i> <sup>-/-</sup> | AC     | NM                    |                   |                  |        |                   |
| 10 | <i>Arf</i> <sup>-/-</sup> | AC     | CCT -> CCC (358bp)    | P67P              | Synonymous       | Exon 4 | --                |
| 11 | <i>Arf</i> <sup>-/-</sup> | AC     | A (453bp)             | Stop codon at 129 | Frameshift       | Exon 4 | Transactivation   |
| 12 | <i>Arf</i> <sup>-/-</sup> | AC     | AGC -> AAC (612bp)    | S152N             | Missense         | Exon 5 | DNA Binding       |
| 13 | <i>Arf</i> <sup>-/-</sup> | AC     | NM                    |                   |                  |        |                   |
| 14 | <i>Arf</i> <sup>-/-</sup> | AC     | NM                    |                   |                  |        |                   |
| 15 | <i>Arf</i> <sup>-/-</sup> | AC     | CAG ->> CGG (180bp)   | Q8R               | Missense         | Exon 2 | Transactivation   |
| 16 | <i>Arf</i> <sup>-/-</sup> | AC     | NM                    |                   |                  |        |                   |
| NL | <i>Arf</i> <sup>+/+</sup> | Lung   | NM                    |                   |                  |        |                   |
| NL | <i>Arf</i> <sup>-/-</sup> | Lung   | NM                    |                   |                  |        |                   |

<sup>1</sup> Sequences aligned to *Trp53* transcript VEGA OTTMUST00000013379 (1772bp) - CCDS36193.1 1173nt (158-1330bp); [Exon2-11]; 390 amino acids.

<sup>2</sup> NM, no mutation
